# Supplementary material
Source: MDPI journal article supplement (https://www.mdpi.com/2073-4395/14/12/2952)
Supplement: s1 [file agronomy-3295210-supplementary.pdf › agronomy-3295210-supplementary.pdf]

**Table S1.** Basic Information of Biochar.

| No | Title of the paper involved into the analysis                                                                                                                          | link of the source                                                                                          | temperatures of pyrolysis | Feedstock                | rate of biochar               | surface area of biochar | scientific names of plants |
|----|------------------------------------------------------------------------------------------------------------------------------------------------------------------------|-------------------------------------------------------------------------------------------------------------|---------------------------|--------------------------|-------------------------------|-------------------------|----------------------------|
| 1  | Biochar application increased the growth and yield and reduced cadmium in drought stressed wheat grown in an aged contaminated soil.                                   | <a href="https://doi.org/10.1016/j.ecoenv.2017.11.063">https://doi.org/10.1016/j.ecoenv.2017.11.063</a> .   | /                         | wheat straw              | 3.0% w/w<br>5.0% w/w          | /                       | wheat                      |
| 2  | Combined use of zinc nanoparticles and co-composted biochar enhanced wheat growth and decreased cd concentration in grains under cd and drought stress: a field study. | <a href="https://doi.org/10.1016/j.eti.2021.101518">https://doi.org/10.1016/j.eti.2021.101518</a> .         | /                         | /                        | 0.5% w/w                      | /                       | wheat                      |
| 3  | Acc-deaminase producing plant growth promoting rhizobacteria and biochar mitigate adverse effects of drought stress on maize growth.                                   | <a href="https://doi.org/10.1371/journal.pone.0250286">https://doi.org/10.1371/journal.pone.0250286</a> .   | 389 °C                    | wood                     | 5.0% w/w                      | /                       | maize                      |
| 4  | Biochar and vermicompost improve growth and physiological traits of eggplant (solanum melongena l.) Under deficit irrigation.                                          | <a href="https://doi.org/10.1186/s40538-021-00216-9">https://doi.org/10.1186/s40538-021-00216-9</a> .       | 560 °C                    | pistachio<br>date palm   | 500 g m <sup>-2</sup>         | /                       | eggplant                   |
| 5  | Plant growth response of broad bean (vicia faba l.) To biochar amendment of loamy sand soil under irrigated and drought conditions.                                    | <a href="https://doi.org/10.1007/s42398-020-00116-y">https://doi.org/10.1007/s42398-020-00116-y</a> .       | 600 °C                    | maize                    | 2% wt<br>4% wt                | /                       | broad bean                 |
| 6  | Maize growth and yield modelling using aquacrop under deficit irrigation with sole and combined application of biochar and inorganic fertiliser.                       | <a href="https://doi.org/10.1007/s42729-020-00310-1">https://doi.org/10.1007/s42729-020-00310-1</a> .       | 500 °C                    | maize cob residue        | 20 Mg ha <sup>-1</sup>        | /                       | Maize                      |
| 7  | Effects of biochar and inorganic fertiliser applications on growth, yield and water use efficiency of maize under deficit irrigation.                                  | <a href="https://doi.org/10.1016/j.agwat.2019.02.044">https://doi.org/10.1016/j.agwat.2019.02.044</a> .     | 500 °C                    | maize-cob residues       | 20 t/ha                       |                         | maize                      |
| 8  | Integration of seed priming and biochar application improves drought tolerance in cowpea.                                                                              | <a href="https://doi.org/10.1007/s00344-020-10245-7">https://doi.org/10.1007/s00344-020-10245-7</a> .       | 500 °C                    | mango wood               | 25 g/kg                       | 23.5                    | cowpea                     |
| 9  | Integrated effects of cattle manure-derived biochar and soil moisture conditions on soil chemical characteristics and soybean yield. Arch.                             | <a href="https://doi.org/10.1080/03650340.2019.1576864">https://doi.org/10.1080/03650340.2019.1576864</a> . | 400 °C                    | cattle<br>manure-derived | 1.25% wt<br>2.5% wt<br>5 % wt | /                       | soybean                    |
| 10 | Does biochar mitigate the adverse effects of drought on the                                                                                                            | <a href="https://doi.org/10.1016/j.i">https://doi.org/10.1016/j.i</a>                                       | 600 °C                    | cattle manure            | 1.25 % wt                     | /                       | soybean                    |

|    |                                                                                                                                                                                             |                                                                                                             |            |                |                                                                          |       |                             |
|----|---------------------------------------------------------------------------------------------------------------------------------------------------------------------------------------------|-------------------------------------------------------------------------------------------------------------|------------|----------------|--------------------------------------------------------------------------|-------|-----------------------------|
|    | agronomic traits and yield components of soybean?                                                                                                                                           | ndcrop.2018.11.047.                                                                                         |            |                | 2.5 % wt<br>5 % wt                                                       |       |                             |
| 11 | Differences in physiological and biochemical attributes of wheat in response to single and combined salicylic acid and biochar subjected to limited water irrigation in saline sodic soil.  | <a href="https://doi.org/10.3390/plants9101346">https://doi.org/10.3390/plants9101346</a> .                 | /          | /              | /                                                                        | /     | wheat                       |
| 12 | Potential effects of biochar application on mitigating the drought stress implications on wheat (triticum aestivum l.) Under various growth stages.                                         | <a href="https://doi.org/10.1016/j.jscs.2020.10.005">https://doi.org/10.1016/j.jscs.2020.10.005</a> .       | 500 °C     | wheat straw    | 27.88 g kg <sup>-1</sup><br>37.18 g kg <sup>-1</sup>                     | 73.8  | wheat                       |
| 13 | Biochar and arbuscular mycorrhizal fungi mediated enhanced drought tolerance in okra (abelmoschus esculentus) plant growth, root morphological traits and physiological properties.         | <a href="https://doi.org/10.1016/j.sjbs.2021.08.016">https://doi.org/10.1016/j.sjbs.2021.08.016</a> .       | 400-500 °C | Wood           | /                                                                        | /     | okra                        |
| 14 | Influence of biochar on drought tolerance of chenopodium quinoa willd and on soil – plant relations.                                                                                        | <a href="https://doi.org/10.1007/s11104-011-0771-5">https://doi.org/10.1007/s11104-011-0771-5</a> .         | 400 °C     | peanut hull    | 100 t ha <sup>-1</sup><br>200 t ha <sup>-1</sup>                         | /     | chenopodium quinoa<br>willd |
| 15 | Effect of alternate furrow irrigation on maize productivity in interaction with different irrigation regimes and biochar amendment.                                                         | <a href="https://doi.org/10.1080/00103624.2020.1733001">https://doi.org/10.1080/00103624.2020.1733001</a> . | 400 °C     | walnut         | 10 t ha <sup>-1</sup>                                                    | /     | maize                       |
| 16 | The application of biochar alleviated the adverse effects of drought on the growth, physiology, yield and quality of rapeseed through regulation of soil status and nutrients availability. | <a href="https://doi.org/10.1016/j.ndcrop.2021.113878">https://doi.org/10.1016/j.ndcrop.2021.113878</a> .   | 600 °C     | rice straw     | 15 t ha <sup>-1</sup><br>30 t ha <sup>-1</sup><br>60 t ha <sup>-1</sup>  | /     | rapeseed                    |
| 17 | Can biochar improve pumpkin productivity and its physiological characteristics under reduced irrigation regimes?                                                                            | <a href="https://doi.org/10.1016/j.scienta.2018.11.059">https://doi.org/10.1016/j.scienta.2018.11.059</a> . | 350 °C     | Maize straw    | 5 t ha <sup>-1</sup><br>10 t ha <sup>-1</sup><br>20 t ha <sup>-1</sup>   | 53.03 | pumpkin                     |
| 18 | Biochar application rate does not improve plant water availability in soybean under drought stress.                                                                                         | <a href="https://doi.org/10.1016/j.agwat.2021.106940">https://doi.org/10.1016/j.agwat.2021.106940</a> .     | 400 °C     | poultry litter | 25 t ha <sup>-1</sup><br>50 t ha <sup>-1</sup><br>100 t ha <sup>-1</sup> | /     | soybean                     |
| 19 | Wheat straw biochar increases potassium concentration, root density, and yield of faba bean in a sandy loam soil.                                                                           | <a href="https://doi.org/10.1080/00103624.2019.1635145">https://doi.org/10.1080/00103624.2019.1635145</a> . | 550 °C     | wheat straw    | 1.25% w/w<br>2.50% w/w                                                   | /     | faba bean                   |

|    |                                                                                                                                                                                |                                                                                                       |            |                                           |                                                                         |      |                                        |
|----|--------------------------------------------------------------------------------------------------------------------------------------------------------------------------------|-------------------------------------------------------------------------------------------------------|------------|-------------------------------------------|-------------------------------------------------------------------------|------|----------------------------------------|
|    |                                                                                                                                                                                |                                                                                                       |            |                                           | 3.75% w/w<br>5.00% w/w                                                  |      |                                        |
| 20 | Effects of soil amendment with wood ash on transpiration, growth, and metal uptake in two contrasting maize ( <i>Zea mays</i> L.) Hybrids to drought tolerance.                | <a href="https://doi.org/10.3389/fpls.2021.661909">https://doi.org/10.3389/fpls.2021.661909</a> .     | 800 °C     | willow wood ash                           | 0.10% w/w                                                               | /    | maize                                  |
| 21 | Interactive effect of biochar and silicon on improving morpho-physiological and biochemical attributes of maize by reducing drought hazards.                                   | <a href="https://doi.org/10.1007/s42729-020-00253-7">https://doi.org/10.1007/s42729-020-00253-7</a> . | /          | /                                         | 4 t ha <sup>-1</sup>                                                    | /    | maize                                  |
| 22 | Integrative effects of rice-straw biochar and silicon on oil and seed quality, yield and physiological traits of <i>helianthus annuus</i> L. Grown under water deficit stress. | <a href="https://doi.org/10.3390/agronomy9100637">https://doi.org/10.3390/agronomy9100637</a> .       | 500-550 °C | rice-straw                                | 10.0 t ha <sup>-1</sup>                                                 | 22.4 | <i>helianthus annuus</i> L.            |
| 23 | Impact of biochar in mitigating the negative effect of drought stress on cabbage seedlings.                                                                                    | <a href="https://doi.org/10.1007/s42729-021-00522-z">https://doi.org/10.1007/s42729-021-00522-z</a> . | 550 °C     | 60% sewage sludge and 40% domestic wastes | 5 % wt<br>10 % wt                                                       | /    | cabbage seedlings                      |
| 24 | Biochar addition alleviate the negative effects of drought and salinity stress on soybean productivity and water use efficiency.                                               | <a href="https://doi.org/10.1186/s12870-020-02493-2">https://doi.org/10.1186/s12870-020-02493-2</a> . | 550 °C     | rice-straw                                | 5 g kg <sup>-1</sup><br>10 g kg <sup>-1</sup>                           | /    | soybean                                |
| 25 | The effect of biochar amendment on the growth, morphology and physiology of <i>quercus castaneifolia</i> seedlings under water-deficit stress.                                 | <a href="https://doi.org/10.1007/s10342-019-01217-y">https://doi.org/10.1007/s10342-019-01217-y</a> . | /          | /                                         | 10 g kg <sup>-1</sup><br>20 g kg <sup>-1</sup><br>30 g kg <sup>-1</sup> | /    | <i>quercus castaneifolia</i> seedlings |
